# Supplementary material for: In Situ Regeneration of Copper-Coated Gas Diffusion Electrodes for Electroreduction of CO2 to Ethylene
Source: MDPI journal article supplement (doi:10.3390/ma14123171), 2021-06-09
Supplement: s1 [file s1]

## Electronic supplementary information

# In Situ Regeneration of Copper-Coated Gas Diffusion Electrodes for Electroreduction of CO<sub>2</sub> to Ethylene

**Magdalena Bisztyga-Szklarz <sup>1</sup>, Krzysztof Mech <sup>1\*</sup>, Mateusz Marzec <sup>1</sup>, Roberts Kalendarev <sup>2</sup>, and Konrad Szaciłowski <sup>1\*</sup>**

<sup>1</sup> AGH University of Science and Technology, Academic Centre for Materials and Nanotechnology, al. A. Mickiewicza 30, 30-059 Krakow, Poland; [mbs@agh.edu.pl](mailto:mbs@agh.edu.pl) (M.B.S.) [kmech@agh.edu.pl](mailto:kmech@agh.edu.pl) (K.M.); [mmarzec@agh.edu.pl](mailto:mmarzec@agh.edu.pl) (M.M.); [szacilow@agh.edu.pl](mailto:szacilow@agh.edu.pl) (K.S.)

<sup>2</sup> Institute of Solid State Physics, University of Latvia, Kengaraga Street 8, LV-1063 Riga, Latvia; [robert.kalendarev@cfi.lu.lv](mailto:robert.kalendarev@cfi.lu.lv)

\* Correspondence: [kmech@agh.edu.pl](mailto:kmech@agh.edu.pl) (K.M.), [szacilow@agh.edu.pl](mailto:szacilow@agh.edu.pl) (K.S.)

**Table 1.** Results of EDS analysis.

| Site | Element | Wt % | At % | Error % |
|------|---------|------|------|---------|
| 1    | C       | 52.5 | 70.1 | 7.6     |
|      | O       | 14.1 | 14.1 | 10.4    |
|      | F       | 11.4 | 9.6  | 9.8     |
|      | K       | 4.0  | 1.7  | 2.6     |
|      | Cu      | 18.0 | 4.5  | 3.1     |
| 2    | C       | 50.7 | 11.0 | 10.8    |
|      | O       | 10.1 | 5.9  | 10.1    |
|      | F       | 6.4  | 1.7  | 3.4     |
|      | K       | 3.7  | 8.0  | 3.0     |
|      | Cu      | 29.1 | 11.0 | 10.8    |
| 3    | C       | 53.3 | 69.9 | 7.4     |
|      | O       | 15.2 | 15.0 | 10.2    |
|      | F       | 11.8 | 9.8  | 9.7     |
|      | K       | 3.2  | 1.3  | 2.6     |
|      | Cu      | 16.5 | 4.1  | 3.1     |
| 4    | O       | 13.2 | 31.4 | 9.2     |
|      | F       | 8.4  | 16.9 | 9.1     |
|      | K       | 12.4 | 12.1 | 3.3     |
|      | Cu      | 66.0 | 39.6 | 2.4     |
| 5    | O       | 33.2 | 61.2 | 9.4     |
|      | K       | 26.8 | 20.2 | 2.2     |
|      | Cu      | 40.0 | 18.6 | 2.4     |
| 6    | O       | 36.1 | 64.8 | 9.1     |
|      | K       | 22.2 | 16.3 | 2.4     |
|      | Cu      | 41.7 | 18.8 | 2.4     |
| 7    | O       | 33.2 | 61.2 | 9.4     |
|      | K       | 26.8 | 20.2 | 2.2     |
|      | Cu      | 40.0 | 18.6 | 2.4     |
| 8    | O       | 36.1 | 64.8 | 9.1     |
|      | K       | 22.2 | 16.3 | 2.4     |
|      | Cu      | 41.7 | 18.8 | 2.4     |
